# Supplementary material
Source: Research Square preprint supplement (doi:10.21203/rs.3.rs-8964821/v1)

**Supplementary Table S1.** Overall and Sex-stratified Absolute Number of Deaths Due to Cardiomyopathy and Diabetes Mellitus in Adults in the United States, 1999-2019

| **Year** | **Overall** | **Female** | **Male** | **Population** |
| --- | --- | --- | --- | --- |
| 1999 | 7621 | 3499 | 4122 | 180408769 |
| 2000 | 7869 | 3574 | 4295 | 181984640 |
| 2001 | 7810 | 3507 | 4303 | 184305128 |
| 2002 | 7771 | 3314 | 4457 | 186208028 |
| 2003 | 7521 | 3295 | 4226 | 188090429 |
| 2004 | 7303 | 3168 | 4135 | 190205384 |
| 2005 | 7331 | 3051 | 4280 | 192551384 |
| 2006 | 7095 | 3011 | 4084 | 195019359 |
| 2007 | 6885 | 2850 | 4035 | 197403777 |
| 2008 | 6750 | 2772 | 3978 | 199795090 |
| 2009 | 6585 | 2645 | 3940 | 202107016 |
| 2010 | 6510 | 2550 | 3960 | 203891983 |
| 2011 | 6442 | 2485 | 3957 | 206592936 |
| 2012 | 6292 | 2449 | 3843 | 208826037 |
| 2013 | 6302 | 2306 | 3996 | 211085314 |
| 2014 | 5925 | 2136 | 3789 | 213809280 |
| 2015 | 5892 | 2215 | 3677 | 216553817 |
| 2016 | 5756 | 2137 | 3619 | 218641417 |
| 2017 | 5892 | 2155 | 3737 | 221447331 |
| 2018 | 5689 | 1999 | 3690 | 223311190 |
| 2019 | 5926 | 2129 | 3797 | 224981167 |
| Total | 141167 | 57247 | 83920 | 4247219476 |

**Supplementary Table S2.** Absolute Number of Deaths Due to Cardiomyopathy and Diabetes Mellitus in Adults stratified by Races in the United States, 1999-2019

| **Year** | **American Indian or Alaska Native** | **Asian or Pacific Islander** | **Black or African American** | **White** |
| --- | --- | --- | --- | --- |
| 1999 | 59 | 162 | 1224 | 6176 |
| 2000 | 62 | 171 | 1334 | 6302 |
| 2001 | 70 | 200 | 1310 | 6230 |
| 2002 | 56 | 194 | 1242 | 6279 |
| 2003 | 78 | 196 | 1293 | 5954 |
| 2004 | 68 | 185 | 1310 | 5740 |
| 2005 | 55 | 184 | 1244 | 5848 |
| 2006 | 54 | 199 | 1285 | 5557 |
| 2007 | 45 | 163 | 1202 | 5475 |
| 2008 | 42 | 176 | 1276 | 5256 |
| 2009 | 63 | 186 | 1198 | 5138 |
| 2010 | 45 | 162 | 1137 | 5166 |
| 2011 | 56 | 189 | 1194 | 5003 |
| 2012 | 50 | 190 | 1118 | 4934 |
| 2013 | 69 | 203 | 1136 | 4894 |
| 2014 | 63 | 207 | 1083 | 4572 |
| 2015 | 58 | 192 | 1110 | 4532 |
| 2016 | 63 | 204 | 1018 | 4471 |
| 2017 | 67 | 212 | 1139 | 4474 |
| 2018 | 63 | 216 | 1095 | 4315 |
| 2019 | 67 | 211 | 1067 | 4581 |
| Total | 1253 | 4002 | 25015 | 110897 |

**Supplementary Table S3.** Absolute Number of Deaths Due to Cardiomyopathy and Diabetes Mellitus in Adults stratified by Census Regions in the United States, 1999-2019

| **Year** | **Northeast** | **Midwest** | **South** | **West** |
| --- | --- | --- | --- | --- |
| 1999 | 1420 | 1913 | 2756 | 1532 |
| 2000 | 1466 | 1902 | 2893 | 1608 |
| 2001 | 1430 | 1862 | 2947 | 1571 |
| 2002 | 1514 | 1871 | 2832 | 1554 |
| 2003 | 1262 | 1875 | 2811 | 1573 |
| 2004 | 1301 | 1751 | 2743 | 1508 |
| 2005 | 1263 | 1743 | 2846 | 1479 |
| 2006 | 1216 | 1710 | 2744 | 1425 |
| 2007 | 1133 | 1685 | 2632 | 1435 |
| 2008 | 1116 | 1699 | 2570 | 1365 |
| 2009 | 1092 | 1588 | 2476 | 1429 |
| 2010 | 1102 | 1562 | 2450 | 1396 |
| 2011 | 1084 | 1522 | 2367 | 1469 |
| 2012 | 1016 | 1454 | 2381 | 1441 |
| 2013 | 1022 | 1457 | 2368 | 1455 |
| 2014 | 957 | 1394 | 2207 | 1367 |
| 2015 | 921 | 1366 | 2182 | 1423 |
| 2016 | 920 | 1359 | 2101 | 1376 |
| 2017 | 866 | 1409 | 2188 | 1429 |
| 2018 | 899 | 1351 | 2105 | 1334 |
| 2019 | 884 | 1498 | 2104 | 1440 |
| Total | 23884 | 33971 | 52703 | 30609 |

**Supplementary Table S4.** Absolute Number of Deaths Due to Cardiomyopathy and Diabetes Mellitus in Adults stratified by Urbanization in the United States, 1999-2019

| **Year** | **Metropolitan** | **Non-Metropolitan** |
| --- | --- | --- |
| 1999 | 6219 | 1402 |
| 2000 | 6459 | 1410 |
| 2001 | 6323 | 1487 |
| 2002 | 6304 | 1467 |
| 2003 | 6084 | 1437 |
| 2004 | 5953 | 1350 |
| 2005 | 6003 | 1328 |
| 2006 | 5868 | 1227 |
| 2007 | 5609 | 1276 |
| 2008 | 5553 | 1197 |
| 2009 | 5427 | 1158 |
| 2010 | 5286 | 1224 |
| 2011 | 5228 | 1214 |
| 2012 | 5217 | 1075 |
| 2013 | 5224 | 1078 |
| 2014 | 4888 | 1037 |
| 2015 | 4870 | 1022 |
| 2016 | 4745 | 1011 |
| 2017 | 4850 | 1042 |
| 2018 | 4706 | 983 |
| 2019 | 4863 | 1063 |
| Total | 115679 | 25488 |

**Supplementary Table S5.** Absolute Number of Deaths Due to Cardiomyopathy and Diabetes Mellitus in Adults stratified by Ten-year Age Groups in the United States, 1999-2019

| **Year** | **25-34 Years** | **35-44 Years** | **45-54 Years** | **55-64 Years** | **65-74 Years** | **75-84 Years** | **85+ Years** |
| --- | --- | --- | --- | --- | --- | --- | --- |
| 1999 | 48 | 191 | 595 | 1254 | 2236 | 2350 | 947 |
| 2000 | 46 | 186 | 621 | 1250 | 2195 | 2508 | 1063 |
| 2001 | 31 | 207 | 550 | 1234 | 2163 | 2483 | 1142 |
| 2002 | 60 | 208 | 574 | 1233 | 2082 | 2472 | 1142 |
| 2003 | 63 | 213 | 571 | 1203 | 1944 | 2397 | 1130 |
| 2004 | 63 | 190 | 621 | 1217 | 1798 | 2311 | 1103 |
| 2005 | 49 | 204 | 598 | 1159 | 1774 | 2358 | 1189 |
| 2006 | 67 | 174 | 576 | 1191 | 1625 | 2230 | 1232 |
| 2007 | 52 | 180 | 570 | 1148 | 1575 | 2108 | 1252 |
| 2008 | 45 | 157 | 530 | 1174 | 1659 | 1953 | 1232 |
| 2009 | 35 | 191 | 535 | 1072 | 1602 | 1948 | 1202 |
| 2010 | 43 | 176 | 543 | 1130 | 1558 | 1860 | 1200 |
| 2011 | 47 | 164 | 524 | 1129 | 1573 | 1791 | 1214 |
| 2012 | 54 | 147 | 485 | 1088 | 1567 | 1753 | 1198 |
| 2013 | 43 | 147 | 454 | 1106 | 1587 | 1791 | 1174 |
| 2014 | 42 | 166 | 452 | 1061 | 1587 | 1508 | 1109 |
| 2015 | 37 | 150 | 479 | 1096 | 1545 | 1514 | 1071 |
| 2016 | 48 | 146 | 455 | 1051 | 1565 | 1444 | 1047 |
| 2017 | 51 | 157 | 488 | 1038 | 1623 | 1512 | 1023 |
| 2018 | 49 | 156 | 450 | 1015 | 1501 | 1495 | 1023 |
| 2019 | 51 | 148 | 455 | 1041 | 1622 | 1544 | 1065 |
| Total | 1024 | 3658 | 11126 | 23890 | 36381 | 41330 | 23758 |

**Supplementary Table S6.** Overall and Sex-stratified Age-adjusted Mortality Rates per 1,000,000 for Cardiomyopathy and Diabetes Mellitus in Adults in the United States, 1999-2019

| **Year** | **Overall** | **Female** | **Male** |
| --- | --- | --- | --- |
| 1999 | 43.01 (42.04 – 43.98) | 34.02 (32.89 – 35.16) | 55.25 (53.53 – 56.96) |
| 2000 | 43.95 (42.98 – 44.92) | 34.32 (33.19 – 35.45) | 57.34 (55.60 – 59.08) |
| 2001 | 42.93 (41.97 – 43.88) | 33.07 (31.97 – 34.17) | 56.44 (54.73 – 58.16) |
| 2002 | 41.99 (41.06 – 42.93) | 30.88 (29.82 – 31.93) | 57.43 (55.71 – 59.14) |
| 2003 | 39.95 (39.05 – 40.86) | 30.25 (29.21 – 31.29) | 53.30 (51.67 – 54.94) |
| 2004 | 38.11 (37.23 – 38.99) | 28.72 (27.71 – 29.73) | 50.92 (49.34 – 52.50) |
| 2005 | 37.65 (36.79 – 38.51) | 27.11 (26.14 – 28.07) | 51.76 (50.18 – 53.33) |
| 2006 | 35.69 (34.86 – 36.52) | 26.27 (25.33 – 27.22) | 48.39 (46.88 – 49.90) |
| 2007 | 34.02 (33.21 – 34.83) | 24.46 (23.55 – 25.36) | 46.75 (45.29 – 48.22) |
| 2008 | 32.59 (31.81 – 33.37) | 23.36 (22.48 – 24.24) | 45.02 (43.60 – 46.44) |
| 2009 | 31.36 (30.59 – 32.12) | 21.97 (21.12 – 22.81) | 43.85 (42.46 – 45.24) |
| 2010 | 30.44 (29.70 – 31.19) | 20.93 (20.11 – 21.75) | 42.95 (41.59 – 44.31) |
| 2011 | 29.33 (28.61 – 30.05) | 19.91 (19.11 – 20.70) | 41.63 (40.31 – 42.95) |
| 2012 | 27.98 (27.29 – 28.68) | 19.26 (18.48 – 20.03) | 39.29 (38.03 – 40.56) |
| 2013 | 27.39 (26.71 – 28.08) | 17.73 (17.00 – 18.47) | 39.76 (38.51 – 41.02) |
| 2014 | 25.08 (24.43 – 25.73) | 16.01 (15.32 – 16.70) | 36.47 (35.29 – 37.66) |
| 2015 | 24.38 (23.75 – 25.01) | 16.38 (15.68 – 17.07) | 34.54 (33.40 – 35.68) |
| 2016 | 23.32 (22.71 – 23.93) | 15.55 (14.88 – 16.23) | 33.20 (32.09 – 34.30) |
| 2017 | 23.42 (22.82 – 24.03) | 15.45 (14.78 – 16.11) | 33.46 (32.36 – 34.55) |
| 2018 | 22.18 (21.60 – 22.77) | 13.98 (13.36 – 14.61) | 32.43 (31.36 – 33.50) |
| 2019 | 22.59 (22.00 – 23.17) | 14.66 (14.02 – 15.29) | 32.38 (31.33 – 33.44) |
| Total | 31.32 (31.16 – 31.48) | 22.31 (22.12 – 22.49) | 43.11 (42.82 – 43.41) |

The values are provided as Age-adjusted mortality rates (AAMRs) with 95% confidence intervals.

**Supplementary Table S7.** Age-adjusted Mortality Rates per 1,000,000 for Cardiomyopathy and Diabetes Mellitus in Adults stratified by Race in the United States, 1999-2019

| **Year** | **American Indian or Alaska Native** | **Asian or Pacific Islander** | **Black or African American** | **White** |
| --- | --- | --- | --- | --- |
| 1999 | 59.66 (44.42 – 78.44) | 36.50 (30.60 – 42.41) | 76.07 (71.75 – 80.39) | 39.51 (38.52 – 40.49) |
| 2000 | 59.54 (44.85 – 77.50) | 37.42 (31.57 – 43.27) | 81.56 (77.12 – 86.00) | 39.92 (38.94 – 40.91) |
| 2001 | 73.14 (56.20 – 93.58) | 39.46 (33.77 – 45.16) | 79.12 (74.77 – 83.47) | 38.93 (37.96 – 39.89) |
| 2002 | 50.46 (36.94 – 67.30) | 35.43 (30.24 – 40.61) | 72.73 (68.61 – 76.84) | 38.68 (37.73 – 39.64) |
| 2003 | 69.18 (53.50 – 88.01) | 36.16 (30.90 – 41.42) | 73.36 (69.28 – 77.43) | 36.16 (35.24 – 37.08) |
| 2004 | 55.35 (42.03 – 71.56) | 30.55 (25.99 – 35.11) | 73.10 (69.05 – 77.15) | 34.36 (33.47 – 35.25) |
| 2005 | 44.66 (32.93 – 59.21) | 29.23 (24.86 – 33.59) | 67.80 (63.94 – 71.66) | 34.48 (33.60 – 35.37) |
| 2006 | 42.75 (31.41 – 56.84) | 28.74 (24.61 – 32.86) | 67.67 (63.87 – 71.47) | 32.17 (31.32 – 33.02) |
| 2007 | 30.31 (21.45 – 41.60) | 22.99 (19.32 – 26.66) | 61.54 (57.96 – 65.12) | 31.22 (30.39 – 32.05) |
| 2008 | 30.14 (21.11 – 41.72) | 23.35 (19.77 – 26.92) | 63.83 (60.23 – 67.44) | 29.38 (28.58 – 30.18) |
| 2009 | 42.62 (32.02 – 55.61) | 24.16 (20.58 – 27.75) | 58.85 (55.41 – 62.28) | 28.36 (27.58 – 29.14) |
| 2010 | 28.58 (20.22 – 39.23) | 18.94 (15.92 – 21.96) | 53.94 (50.70 – 57.18) | 28.09 (27.32 – 28.87) |
| 2011 | 30.75 (22.68 – 40.78) | 21.04 (17.94 – 24.14) | 55.33 (52.09 – 58.57) | 26.61 (25.86 – 27.35) |
| 2012 | 28.30 (20.48 – 38.12) | 20.70 (17.68 – 23.72) | 50.28 (47.24 – 53.32) | 25.62 (24.90 – 26.35) |
| 2013 | 37.23 (28.41 – 47.91) | 20.56 (17.67 – 23.46) | 49.53 (46.56 – 52.51) | 24.95 (24.24 – 25.66) |
| 2014 | 30.50 (23.10 – 39.52) | 19.64 (16.91 – 22.37) | 45.64 (42.84 – 48.45) | 22.75 (22.08 – 23.42) |
| 2015 | 29.50 (22.04 – 38.69) | 16.89 (14.45 – 19.33) | 44.90 (42.18 – 47.63) | 22.13 (21.48 – 22.79) |
| 2016 | 28.86 (21.80 – 37.47) | 17.46 (15.02 – 19.91) | 39.77 (37.25 – 42.29) | 21.42 (20.78 – 22.06) |
| 2017 | 28.69 (21.89 – 36.93) | 16.58 (14.31 – 18.86) | 42.94 (40.38 – 45.51) | 21.21 (20.58 – 21.85) |
| 2018 | 26.80 (20.30 – 34.73) | 16.31 (14.10 – 18.52) | 40.28 (37.83 – 42.73) | 19.99 (19.39 – 20.60) |
| 2019 | 27.88 (21.38 – 35.74) | 15.25 (13.16 – 17.34) | 38.17 (35.81 – 40.52) | 20.87 (20.25 – 21.49) |
| Total | 36.96 (34.78 – 39.14) | 22.62 (21.90 – 23.33) | 56.37 (55.66 – 57.09) | 28.65 (28.48 – 28.82) |

The values are provided as Age-adjusted mortality rates (AAMRs) with 95% confidence intervals.

**Supplementary Table S8.** Age-adjusted Mortality Rates per 1,000,000 for Cardiomyopathy and Diabetes Mellitus in Adults stratified by Census Region in the United States, 1999-2019

| **Year** | **Northeast** | **Midwest** | **South** | **West** |
| --- | --- | --- | --- | --- |
| 1999 | 38.35 (36.36 – 40.35) | 45.68 (43.63 – 47.72) | 43.94 (42.30 – 45.58) | 43.05 (40.89 – 45.20) |
| 2000 | 39.20 (37.19 – 41.21) | 45.08 (43.05 – 47.11) | 45.58 (43.92 – 47.25) | 44.52 (42.34 – 46.69) |
| 2001 | 37.84 (35.88 – 39.81) | 43.63 (41.64 – 45.61) | 45.61 (43.96 – 47.26) | 42.45 (40.34 – 44.55) |
| 2002 | 39.62 (37.62 – 41.62) | 43.28 (41.32 – 45.24) | 43.01 (41.42 – 44.60) | 40.84 (38.81 – 42.88) |
| 2003 | 32.51 (30.72 – 34.31) | 42.89 (40.94 – 44.83) | 41.84 (40.29 – 43.39) | 40.51 (38.50 – 42.52) |
| 2004 | 33.27 (31.46 – 35.09) | 39.55 (37.69 – 41.41) | 40.00 (38.50 – 41.50) | 37.84 (35.92 – 39.76) |
| 2005 | 32.03 (30.26 – 33.81) | 38.93 (37.10 – 40.76) | 40.75 (39.25 – 42.25) | 36.24 (34.39 – 38.10) |
| 2006 | 30.22 (28.52 – 31.93) | 37.67 (35.88 – 39.46) | 38.36 (36.92 – 39.80) | 33.95 (32.18 – 35.73) |
| 2007 | 28.02 (26.38 – 29.66) | 36.30 (34.56 – 38.04) | 35.96 (34.58 – 37.34) | 33.51 (31.77 – 35.26) |
| 2008 | 27.25 (25.65 – 28.86) | 36.16 (34.43 – 37.89) | 34.17 (32.85 – 35.51) | 31.04 (29.38 – 32.70) |
| 2009 | 26.52 (24.93 – 28.11) | 33.49 (31.83 – 35.15) | 32.35 (31.07 – 33.63) | 31.86 (30.19 – 33.52) |
| 2010 | 26.38 (24.81 – 27.95) | 32.29 (30.67 – 33.90) | 31.45 (30.19 – 32.70) | 30.31 (28.70 – 31.91) |
| 2011 | 25.44 (23.90 – 26.97) | 30.87 (29.30 – 32.44) | 29.42 (28.23 – 30.62) | 30.96 (29.36 – 32.57) |
| 2012 | 23.45 (21.99 – 24.91) | 29.05 (27.54 – 30.57) | 28.82 (27.66 – 30.00) | 29.38 (27.85 – 30.92) |
| 2013 | 23.41 (21.96 – 24.87) | 28.70 (27.20 – 30.19) | 27.80 (26.67 – 28.93) | 28.80 (27.30 – 30.30) |
| 2014 | 21.40 (20.02 – 22.78) | 26.79 (25.36 – 28.22) | 25.19 (24.13 – 26.26) | 26.15 (24.75 – 27.56) |
| 2015 | 20.62 (19.26 – 21.98) | 25.77 (24.38 – 27.16) | 24.26 (23.23 – 25.29) | 26.32 (24.93 – 27.71) |
| 2016 | 20.00 (18.69 – 21.32) | 25.28 (23.91 – 26.65) | 22.75 (21.77 – 23.74) | 25.02 (23.68 – 26.37) |
| 2017 | 18.35 (17.10 – 19.59) | 26.03 (24.65 – 27.42) | 23.24 (22.25 – 24.23) | 25.35 (24.02 – 26.69) |
| 2018 | 19.01 (17.74 – 20.27) | 24.44 (23.11 – 25.77) | 21.84 (20.89 – 22.79) | 23.17 (21.91 – 24.43) |
| 2019 | 18.39 (17.15 – 19.62) | 26.60 (25.23 – 27.97) | 21.16 (20.24 – 22.08) | 24.50 (23.21 – 25.78) |
| Total | 27.14 (26.79 – 27.48) | 33.56 (33.20 – 33.92) | 32.00 (31.73 – 32.28) | 31.61 (31.26 – 31.97) |

The values are provided as Age-adjusted mortality rates (AAMRs) with 95% confidence intervals.

**Supplementary Table S9.** Age-adjusted Mortality Rates per 1,000,000 for Cardiomyopathy and Diabetes Mellitus in Adults stratified by Urbanization in the United States, 1999-2019

| **Year** | **Metropolitan** | **Non-Metropolitan** |
| --- | --- | --- |
| 1999 | 43.16 (42.09 – 44.24) | 42.42 (40.20 – 44.65) |
| 2000 | 44.30 (43.22 – 45.38) | 42.21 (40.01 – 44.42) |
| 2001 | 42.62 (41.57 – 43.67) | 44.18 (41.93 – 46.43) |
| 2002 | 41.73 (40.70 – 42.76) | 43.12 (40.91 – 45.34) |
| 2003 | 39.55 (38.56 – 40.55) | 41.79 (39.62 – 43.96) |
| 2004 | 38.01 (37.04 – 38.98) | 38.98 (36.90 – 41.07) |
| 2005 | 37.65 (36.70 – 38.61) | 37.56 (35.53 – 39.59) |
| 2006 | 36.00 (35.07 – 36.92) | 34.28 (32.35 – 36.20) |
| 2007 | 33.75 (32.86 – 34.63) | 35.24 (33.29 – 37.18) |
| 2008 | 32.67 (31.81 – 33.54) | 32.31 (30.47 – 34.16) |
| 2009 | 31.40 (30.56 – 32.24) | 31.03 (29.23 – 32.83) |
| 2010 | 30.01 (29.19 – 30.82) | 32.65 (30.80 – 34.50) |
| 2011 | 28.90 (28.11 – 29.69) | 31.79 (29.97 – 33.60) |
| 2012 | 28.02 (27.25 – 28.79) | 28.00 (26.30 – 29.71) |
| 2013 | 27.45 (26.69 – 28.20) | 27.08 (25.44 – 28.72) |
| 2014 | 24.91 (24.21 – 25.62) | 25.86 (24.26 – 27.47) |
| 2015 | 24.18 (23.49 – 24.87) | 25.54 (23.93 – 27.14) |
| 2016 | 23.06 (22.39 – 23.73) | 24.77 (23.20 – 26.33) |
| 2017 | 23.09 (22.43 – 23.75) | 25.30 (23.72 – 26.88) |
| 2018 | 21.91 (21.28 – 22.55) | 23.81 (22.28 – 25.35) |
| 2019 | 22.13 (21.50 – 22.76) | 25.03 (23.48 – 26.58) |
| Total | 31.11 (30.93 – 31.29) | 32.37 (31.97 – 32.77) |

The values are provided as Age-adjusted mortality rates (AAMRs) with 95% confidence intervals.

**Supplementary Table S10.** Crude Mortality Rates per 1,000,000 for Cardiomyopathy and Diabetes Mellitus in Adults stratified by Ten-year Age Groups in the United States, 1999-2019

| **Year** | **25-34 Years** | **35-44 Years** | **45-54 Years** | **55-64 Years** | **65-74 Years** | **75-84 Years** | **85+ Years** |
| --- | --- | --- | --- | --- | --- | --- | --- |
| 1999 | 0.12 (0.09 – 0.16) | 0.42 (0.36 – 0.48) | 1.63 (1.50 – 1.76) | 5.27 (4.98 – 5.57) | 12.14 (11.64 – 12.64) | 19.22 (18.45 – 20.00) | 22.80 (21.34 – 24.25) |
| 2000 | 0.12 (0.08 – 0.15) | 0.41 (0.35 – 0.47) | 1.65 (1.52 – 1.78) | 5.15 (4.86 – 5.43) | 11.94 (11.44 – 12.44) | 20.29 (19.50 – 21.08) | 25.07 (23.57 – 26.58) |
| 2001 | 0.08 (0.05 – 0.11) | 0.46 (0.40 – 0.52) | 1.40 (1.28 – 1.51) | 4.92 (4.64 – 5.19) | 11.77 (11.27 – 12.26) | 19.72 (18.94 – 20.49) | 26.48 (24.95 – 28.02) |
| 2002 | 0.15 (0.12 – 0.20) | 0.47 (0.40 – 0.53) | 1.44 (1.32 – 1.55) | 4.62 (4.36 – 4.88) | 11.32 (10.84 – 11.81) | 19.37 (18.60 – 20.13) | 26.14 (24.62 – 27.66) |
| 2003 | 0.16 (0.12 – 0.20) | 0.48 (0.42 – 0.55) | 1.40 (1.28 – 1.51) | 4.29 (4.05 – 4.54) | 10.51 (10.04 – 10.97) | 18.59 (17.84 – 19.33) | 25.30 (23.83 – 26.78) |
| 2004 | 0.16 (0.12 – 0.20) | 0.43 (0.37 – 0.49) | 1.49 (1.37 – 1.61) | 4.15 (3.92 – 4.39) | 9.63 (9.19 – 10.08) | 17.79 (17.07 – 18.52) | 24.26 (22.83 – 25.70) |
| 2005 | 0.12 (0.09 – 0.17) | 0.47 (0.41 – 0.53) | 1.41 (1.29 – 1.52) | 3.78 (3.56 – 4.00) | 9.39 (8.96 – 9.83) | 18.04 (17.31 – 18.76) | 25.33 (23.89 – 26.77) |
| 2006 | 0.17 (0.13 – 0.22) | 0.40 (0.34 – 0.46) | 1.33 (1.22 – 1.44) | 3.73 (3.52 – 3.94) | 8.46 (8.05 – 8.87) | 17.03 (16.32 – 17.74) | 25.32 (23.91 – 26.73) |
| 2007 | 0.13 (0.10 – 0.17) | 0.42 (0.36 – 0.48) | 1.30 (1.19 – 1.40) | 3.46 (3.27 – 3.67) | 8.00 (7.60 – 8.39) | 16.11 (15.42 – 16.80) | 24.84 (23.47 – 26.22) |
| 2008 | 0.11 (0.08 – 0.15) | 0.37 (0.31 – 0.43) | 1.19 (1.09 – 1.29) | 3.44 (3.24 – 3.63) | 8.09 (7.70 – 8.48) | 14.94 (14.27 – 15.60) | 23.71 (22.39 – 25.04) |
| 2009 | 0.09 (0.06 – 0.12) | 0.46 (0.40 – 0.53) | 1.19 (1.09 – 1.29) | 3.03 (2.85 – 3.21) | 7.54 (7.17 – 7.91) | 14.96 (14.29 – 15.62) | 22.39 (21.13 – 23.66) |
| 2010 | 0.10 (0.08 – 0.14) | 0.43 (0.36 – 0.49) | 1.21 (1.10 – 1.31) | 3.10 (2.92 – 3.28) | 7.17 (6.82 – 7.53) | 14.24 (13.59 – 14.89) | 21.84 (20.61 – 23.08) |
| 2011 | 0.11 (0.08 – 0.15) | 0.40 (0.34 – 0.47) | 1.17 (1.07 – 1.27) | 2.97 (2.79 – 3.14) | 7.00 (6.65 – 7.34) | 13.59 (12.96 – 14.22) | 21.16 (19.97 – 22.35) |
| 2012 | 0.13 (0.10 – 0.17) | 0.36 (0.30 – 0.42) | 1.10 (1.00 – 1.19) | 2.82 (2.65 – 2.99) | 6.53 (6.21 – 6.86) | 13.21 (12.59 – 13.83) | 20.35 (19.20 – 21.50) |
| 2013 | 0.10 (0.07 – 0.14) | 0.36 (0.30 – 0.42) | 1.04 (0.94 – 1.13) | 2.81 (2.65 – 2.98) | 6.29 (5.98 – 6.60) | 13.32 (12.70 – 13.94) | 19.43 (18.32 – 20.55) |
| 2014 | 0.10 (0.07 – 0.13) | 0.41 (0.35 – 0.47) | 1.04 (0.94 – 1.14) | 2.65 (2.49 – 2.81) | 6.01 (5.72 – 6.31) | 11.02 (10.46 – 11.58) | 18.00 (16.94 – 19.06) |
| 2015 | 0.08 (0.06 – 0.12) | 0.37 (0.31 – 0.43) | 1.11 (1.01 – 1.21) | 2.68 (2.52 – 2.84) | 5.61 (5.33 – 5.89) | 10.87 (10.33 – 11.42) | 17.04 (16.01 – 18.05) |
| 2016 | 0.11 (0.08 – 0.14) | 0.36 (0.30 – 0.42) | 1.06 (0.97 – 1.16) | 2.54 (2.38 – 2.69) | 5.47 (5.20 – 5.74) | 10.14 (9.62 – 10.67) | 16.41 (15.42 – 17.40) |
| 2017 | 0.11 (0.08 – 0.15) | 0.38 (0.32 – 0.44) | 1.15 (1.05 – 1.25) | 2.47 (2.32 – 2.62) | 5.47 (5.20 – 5.73) | 10.28 (9.76 – 10.80) | 15.81 (14.85 – 16.78) |
| 2018 | 0.11 (0.08 – 0.14) | 0.38 (0.32 – 0.44) | 1.08 (0.98 – 1.18) | 2.40 (2.25 – 2.55) | 4.92 (4.67 – 5.17) | 9.71 (9.22 – 10.20) | 15.63 (14.67 – 16.59) |
| 2019 | 0.11 (0.08 – 0.15) | 0.35 (0.30 – 0.41) | 1.11 (1.01 – 1.22) | 2.45 (2.30 – 2.60) | 5.15 (4.90 – 5.40) | 9.67 (9.19 – 10.15) | 16.12 (15.16 – 17.09) |
| Total | 0.12 (0.11 – 0.12) | 0.41 (0.40 – 0.42) | 1.25 (1.23 – 1.28) | 3.30 (3.26 – 3.34) | 7.61 (7.53 – 7.69) | 14.65 (14.51 – 14.79) | 21.05 (20.78 – 21.32) |

The values are provided as crude mortality rates with 95% confidence intervals.

**Supplementary Table S11.** Age-adjusted Mortality Rates per 1,000,000 for Cardiomyopathy and Diabetes Mellitus in Adults stratified by the States of United States, 1999-2019

| **State** | **AAMRs (95% CI)** | **Rank** | **Percentile** |
| --- | --- | --- | --- |
| Hawaii | 59.71 (56.39 – 63.02) | 1 | 100 |
| Ohio | 45.65 (44.66 – 46.64) | 2 | 98 |
| Delaware | 40.72 (37.33 – 44.11) | 3 | 96 |
| Maryland | 40.04 (38.66 – 41.43) | 4 | 94 |
| North Carolina | 39.89 (38.82 – 40.97) | 5 | 92 |
| West Virginia | 39.51 (37.31 – 41.7) | 6 | 90 |
| California | 39.34 (38.78 – 39.9) | 7 | 88 |
| District of Columbia | 39.13 (34.79 – 43.47) | 8 | 86 |
| Pennsylvania | 39.02 (38.18 – 39.85) | 9 | 84 |
| South Carolina | 35.76 (34.33 – 37.2) | 10 | 82 |
| Mississippi | 35.73 (33.91 – 37.55) | 11 | 80 |
| Indiana | 35.44 (34.23 – 36.65) | 12 | 78 |
| Wisconsin | 34.06 (32.84 – 35.29) | 13 | 76 |
| New Jersey | 33.72 (32.73 – 34.7) | 14 | 74 |
| Kentucky | 33.2 (31.78 – 34.62) | 15 | 72 |
| Michigan | 33.19 (32.27 – 34.11) | 16 | 70 |
| Vermont | 33.06 (29.5 – 36.62) | 17 | 68 |
| Missouri | 32.11 (30.94 – 33.27) | 18 | 66 |
| Virginia | 31.8 (30.74 – 32.86) | 19 | 64 |
| Tennessee | 31.56 (30.41 – 32.71) | 20 | 62 |
| Florida | 31.38 (30.78 – 31.98) | 21 | 60 |
| Louisiana | 31.23 (29.84 – 32.62) | 22 | 58 |
| Nebraska | 30.67 (28.61 – 32.73) | 23 | 56 |
| Texas | 30.47 (29.84 – 31.1) | 24 | 54 |
| Maine | 30.27 (28.01 – 32.52) | 25 | 52 |
| Washington | 30.02 (28.91 – 31.14) | 26 | 50 |
| Minnesota | 29.2 (27.99 – 30.41) | 27 | 48 |
| Oklahoma | 29.07 (27.63 – 30.51) | 28 | 46 |
| Iowa | 28.72 (27.23 – 30.21) | 29 | 44 |
| Illinois | 28.35 (27.57 – 29.13) | 30 | 42 |
| Oregon | 27.4 (26.06 – 28.74) | 31 | 40 |
| New Hampshire | 27.14 (24.86 – 29.43) | 32 | 38 |
| Georgia | 26.33 (25.39 – 27.27) | 33 | 36 |
| Alabama | 25.84 (24.65 – 27.03) | 34 | 34 |
| Alaska | 25.52 (21.41 – 29.63) | 35 | 32 |
| North Dakota | 24.88 (21.89 – 27.87) | 36 | 30 |
| Connecticut | 24.45 (23.15 – 25.74) | 37 | 28 |
| Kansas | 23.92 (22.45 – 25.4) | 38 | 26 |
| South Dakota | 23.26 (20.62 – 25.9) | 39 | 24 |
| Rhode Island | 22.63 (20.37 – 24.89) | 40 | 22 |
| Idaho | 21.8 (19.8 – 23.8) | 41 | 20 |
| Arkansas | 20.22 (18.89 – 21.55) | 42 | 18 |
| New Mexico | 19.8 (18.18 – 21.43) | 43 | 16 |
| Arizona | 19.75 (18.84 – 20.66) | 44 | 14 |
| Montana | 19.38 (17.2 – 21.56) | 45 | 12 |
| New York | 18.93 (18.43 – 19.42) | 46 | 10 |
| Massachusetts | 18 (17.18 – 18.82) | 47 | 8 |
| Nevada | 17.69 (16.29 – 19.09) | 48 | 6 |
| Wyoming | 17.6 (14.66 – 20.54) | 49 | 4 |
| Utah | 16.6 (15.09 – 18.11) | 50 | 2 |
| Colorado | 15.71 (14.72 – 16.69) | 51 | 0 |

AAMRs: Age-adjusted mortality rates; CI: Confidence interval

**Supplementary Figure S1.** Trends in Census Region-Stratified Age-Adjusted Mortality Rates per 1,000,000 for Cardiomyopathy and Diabetes Mellitus in Adults in the United States, 1999-2019; † indicates an increasing trend in mortality; †† indicates a decreasing trend in mortality; * indicates the value significantly differs from zero at alpha = 0.05


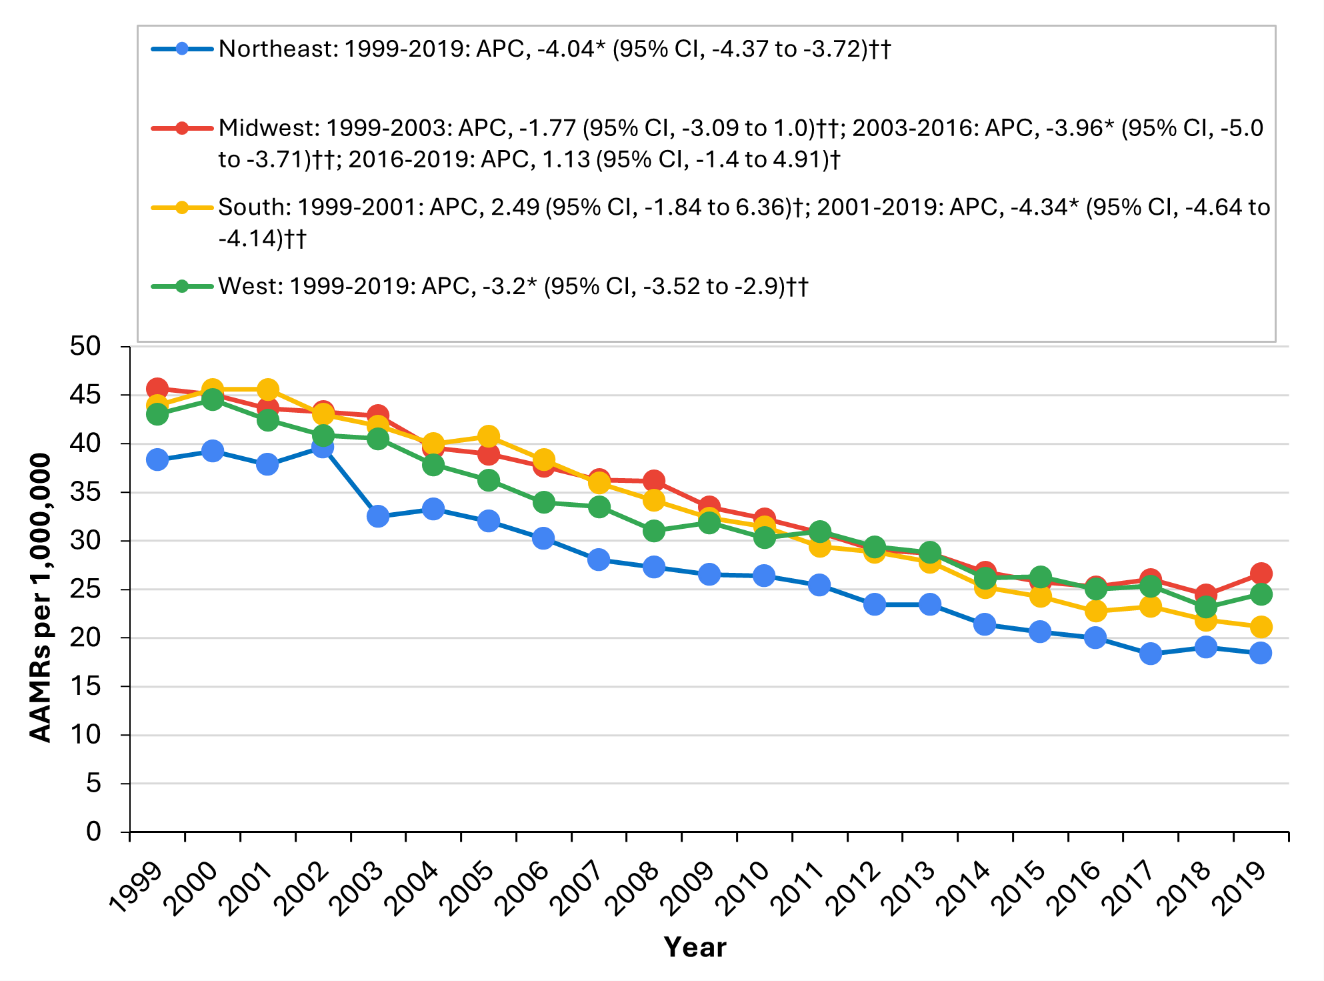


**Supplementary Figure S2.** Urbanization-stratified Trends in Age-adjusted Mortality per 1,000,000 for Cardiomyopathy and Diabetes Mellitus in Adults in the United States, 1999-2019; † indicates an increasing trend in mortality; †† indicates a decreasing trend in mortality; * indicates the value significantly differs from zero at alpha = 0.05


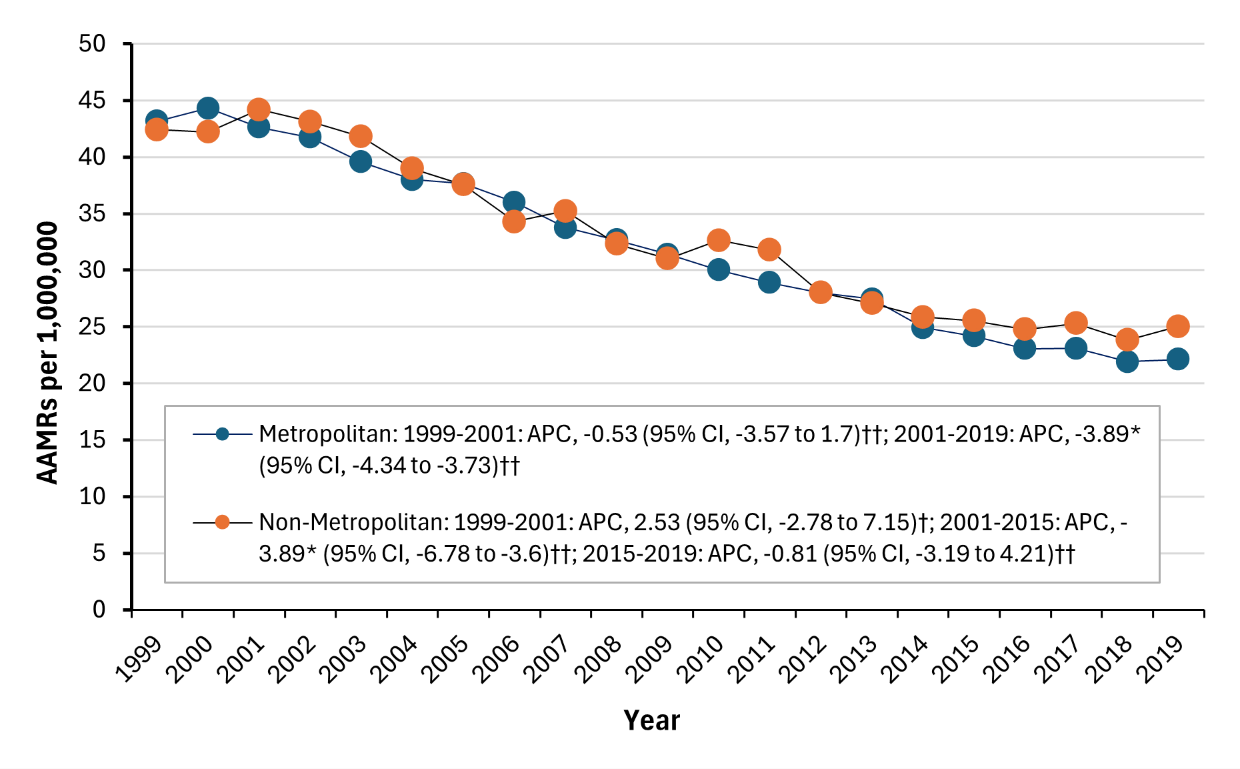

Supplement: Supplementary file 1 [file 694835881d3b8e2ab10b2940.docx]
