# Supplementary material
Source: Research Square preprint supplement (doi:10.21203/rs.3.rs-8964821/v1)
Supplement: Supplementary file 2 [file f049b710705b1f6cd476561f.docx]

**GRAPHICAL ABSTRACT AND TEXT**


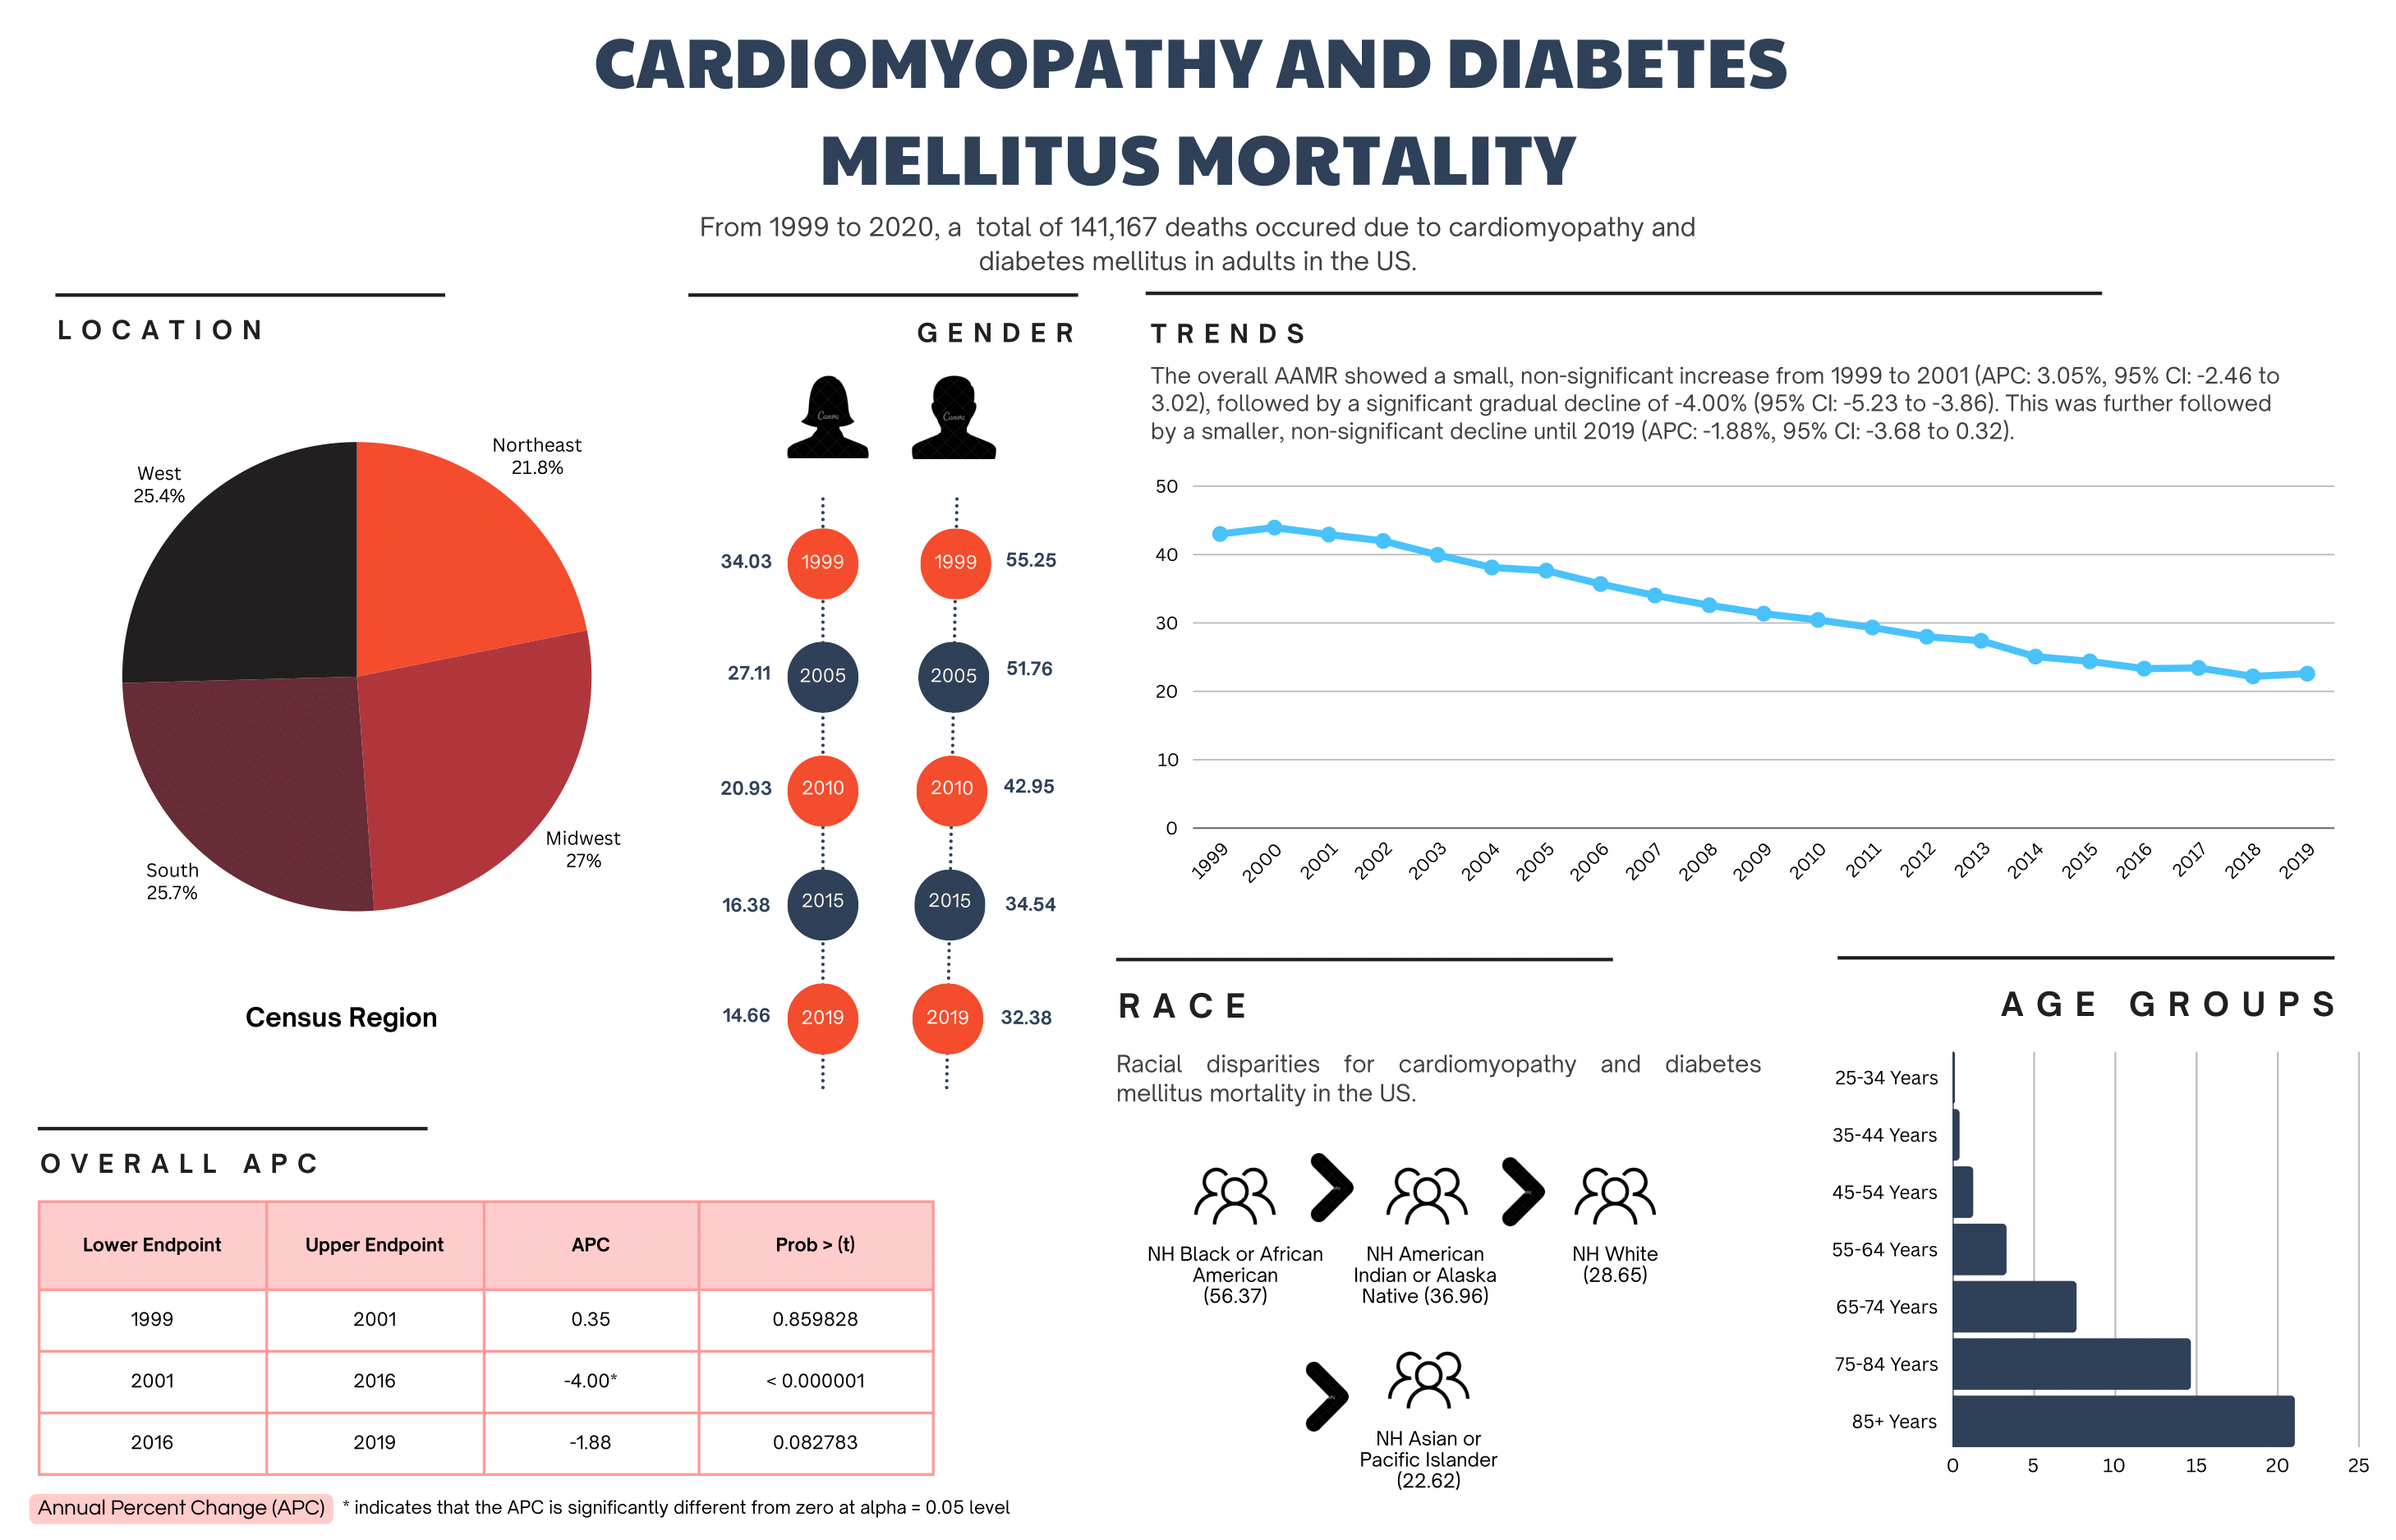


From 1999 to 2020, 141,167 US deaths occurred from cardiomyopathy with diabetes, showing a brief early rise, then a significant decline from 2001 to 2016 and smaller decreases through 2019. Highest mortality occurred in older adults, non-Hispanic Black people, and the Midwest/South.
